# Supplementary material
Source: MDPI journal article supplement (https://www.mdpi.com/2673-4605/7/1/11)
Supplement: s1 [file s1]

Archive with 1 entries (1 files):
- 10.3390IOCPS2021-11274-supplementary.pdf
