# Supplementary material
Source: MDPI journal article supplement (https://www.mdpi.com/2673-4605/7/1/11)
Supplement: s1 [file s1 › 10.3390IOCPS2021-11274-supplementary.pdf]

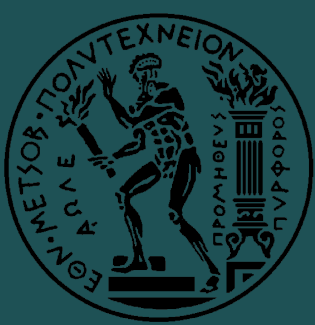

# Evaluation of the parameters of poly(butylene succinate) enzymatic polymerization

C. I. Gkountela, D. N. Markoulakis, D. M. Korres, S. N. Vouyiouka\*  
Laboratory of Polymer Technology, School of Chemical Engineering,  
National Technical University of Athens, Greece,  
(\*mvuyiuka@central.ntua.gr)

## Introduction

Poly(butylene succinate) (PBS) is a **bio-based** and **biodegradable** polyester, that can be used in numerous applications, especially in the biomedical sector [1,2]. Even though green polymerization routes such as **biocatalysis** are being developed [3,4], there is a very limited literature on the enzymatic synthesis of PBS and in most of the works where high-molecular-weight PBS is produced, several drawbacks may impede the process scaling up. On that basis, an **eco-friendly, solvent-free, enzyme-based process for the production of PBS** was applied and the most important process parameters were evaluated.

## Experimental part

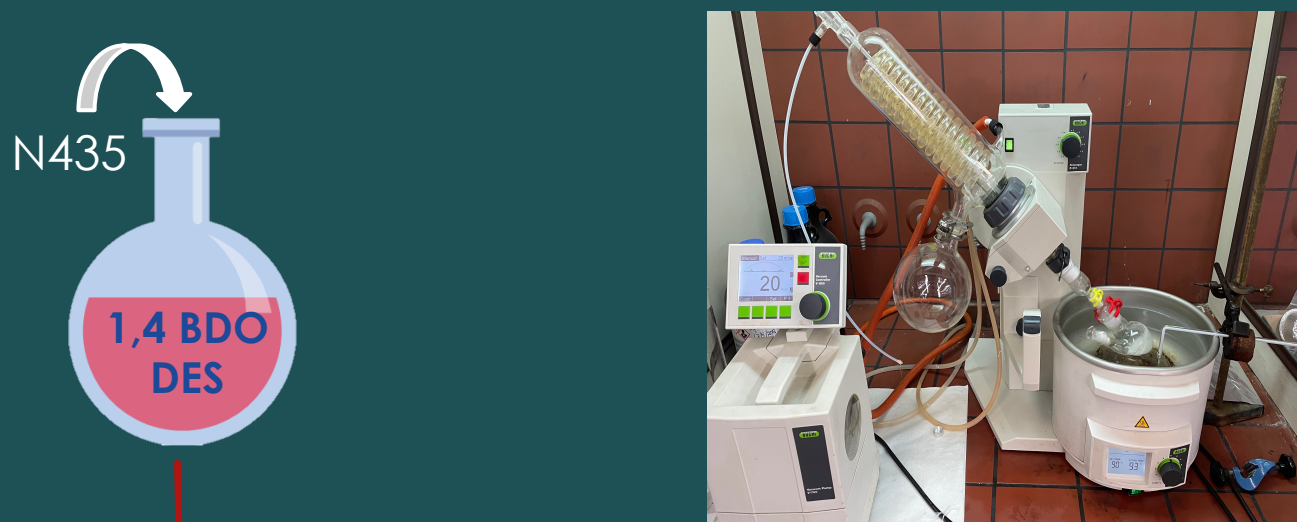

Figure S1. Apparatus for the production of PBS oligomers

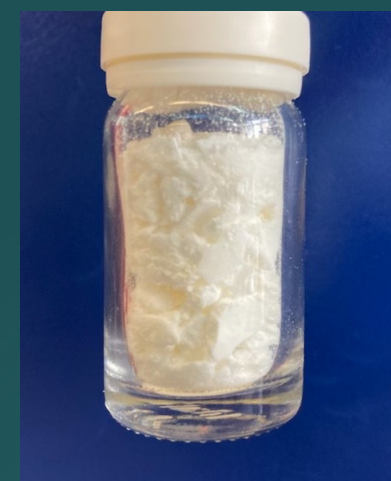

Figure S2. Enzymatically synthesized PBS oligomer (scaled up, 10 g)

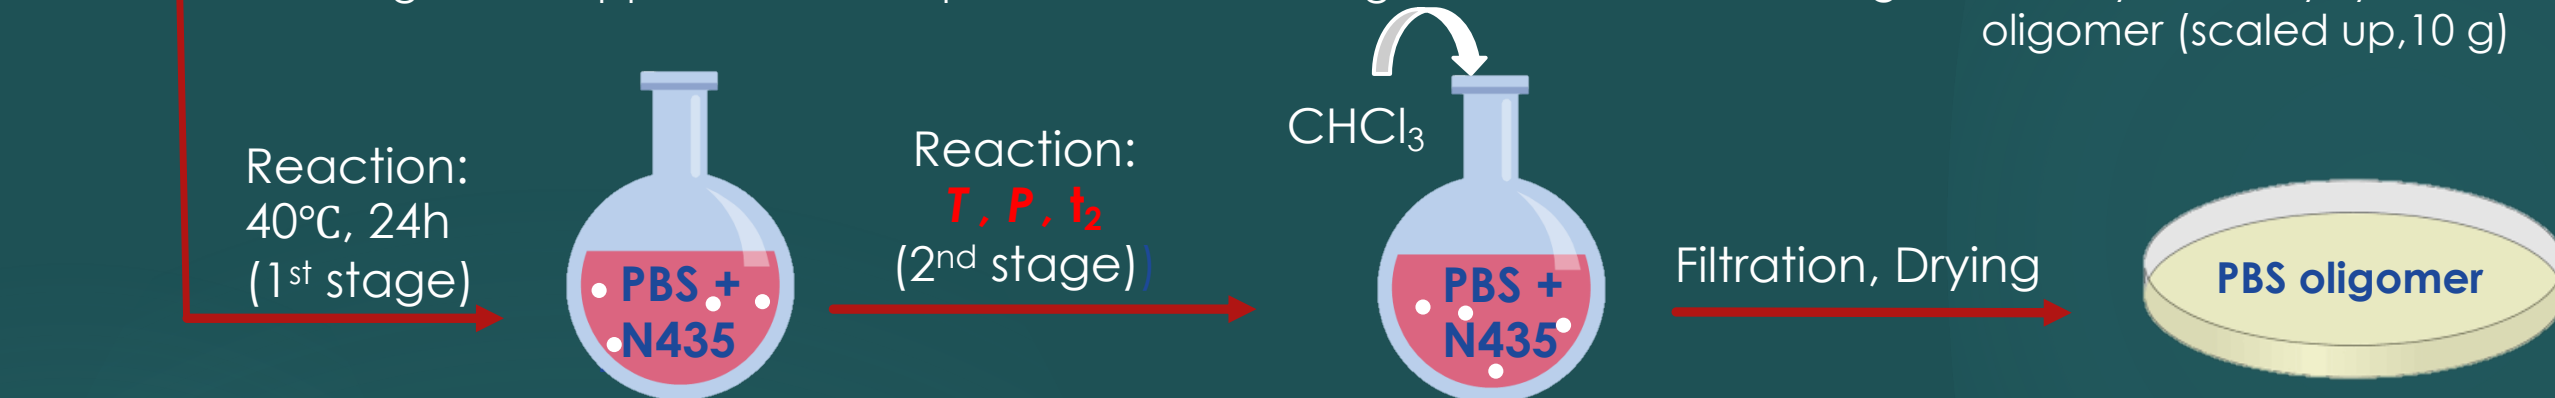

## Results and Discussion

- Evaluated process parameters:

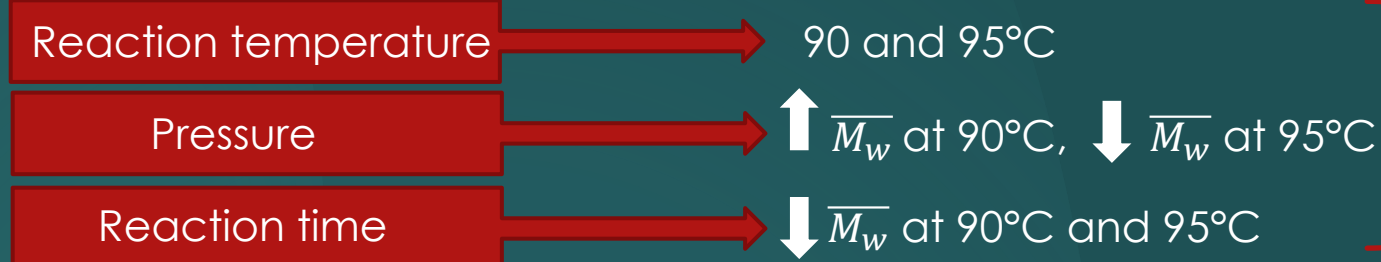

Optimum conditions: 90°C, 20 mbar, 2h

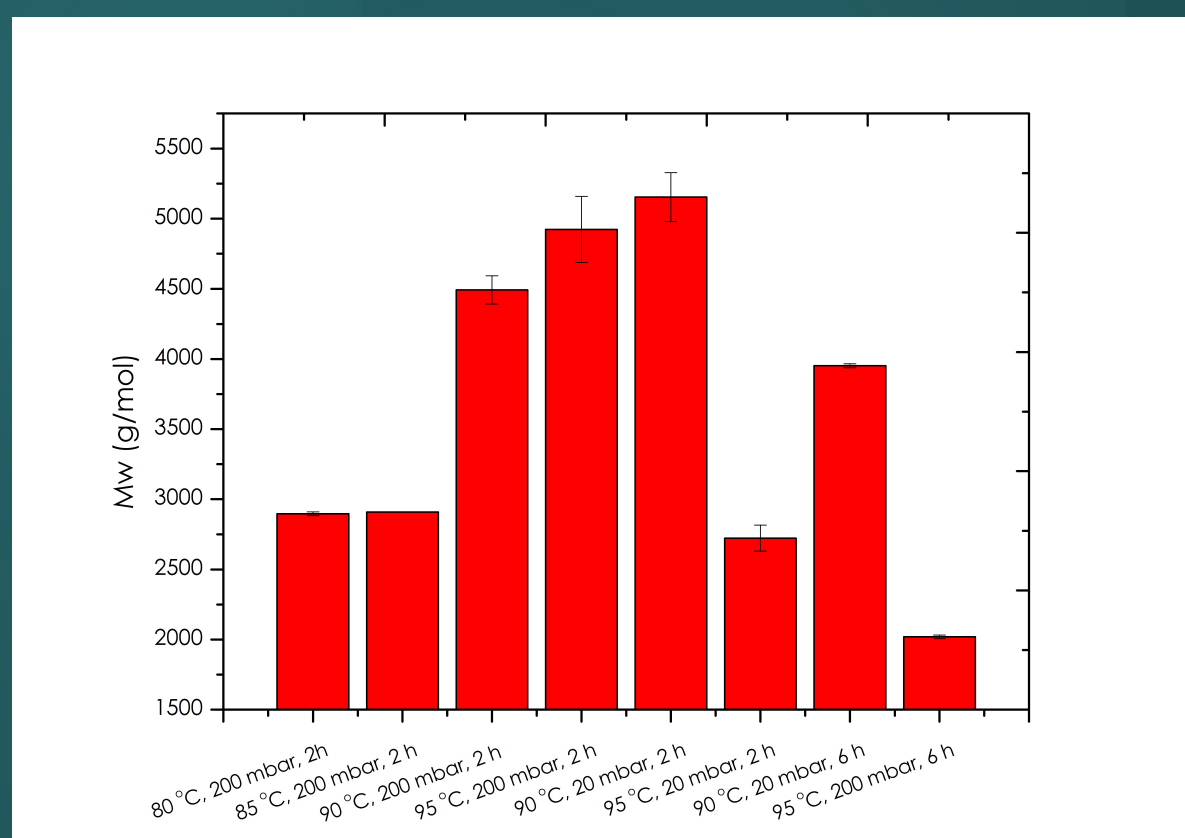

Figure S3.  $\overline{M}_w$  of the enzymatically synthesized oligomers

- The synthesized at 90 °C, 20 mbar, 2h product was successfully **scaled up** (ca. 10 g of product).

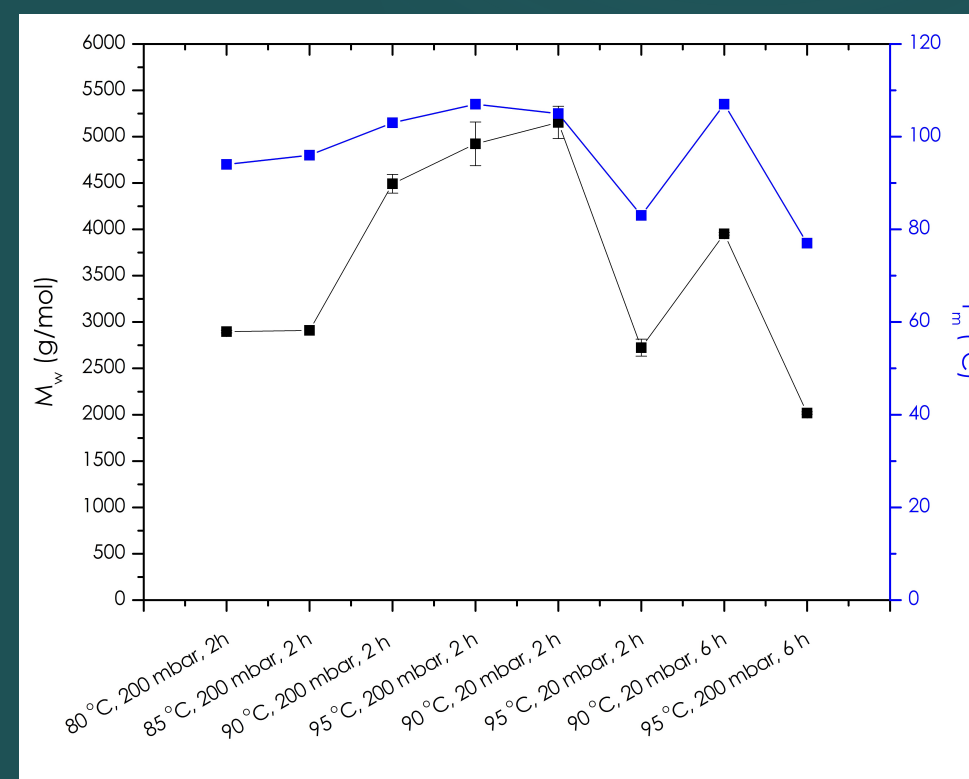

Figure S4.  $\overline{M}_w$  and  $T_m$  of the enzymatically synthesized oligomers

Table 1. Scaled-up PBS oligomer's properties

| $\overline{M}_n$<br>(g/mol) | $\overline{M}_w$<br>(g/mol) | $T_{m1}$<br>(°C) | $T_c$<br>(°C) | $T_{m2}$<br>(°C) | $T_{d,5\%}$<br>(°C) | $T_d$<br>(°C) | Residue<br>(%) |
|-----------------------------|-----------------------------|------------------|---------------|------------------|---------------------|---------------|----------------|
| 1000                        | 4700                        | 104              | 57            | 103              | 258                 | 387           | 1,44           |

## Conclusions

The bulk enzymatic polymerization route resulted in a PBS grade of  $\overline{M}_w$  4700 g/mol, crystallinity ca. 61% and melting points at ca. 104°C. This free of thermal degradation and metal catalyst residues grade is appropriate to be used in biomedicine applications where low controlled molecular weight is usually needed.

## References

- [1] Xu J, Guo B.H, Biotechnology Journal. 2010; 1149–1163.
- [2] Gigli M, Fabbri M, Lotti N, Gamberini R, Rimini B, Munari A. European Polymer Journal. 2016; 75: 431–460.
- [3] Douka A, Vouyiouka S, Papaspyridi L.M, Papaspyrides C.D. Progress in Polymer Science. 2018; 79: 1–25.
- [4] Gkountela C, Rigopoulou M, Barampouti E.M, Vouyiouka S. European Polymer Journal. 2021; 143: 110197
